# Supplementary figures and images for: Quantitative analysis of adulteration of extra virgin olive oil using Raman spectroscopy improved by Bayesian framework least squares support vector machines
Source: Royal Society of Chemistry journal article supplement (doi:10.1039/c2ay25431j), 2012-01-01

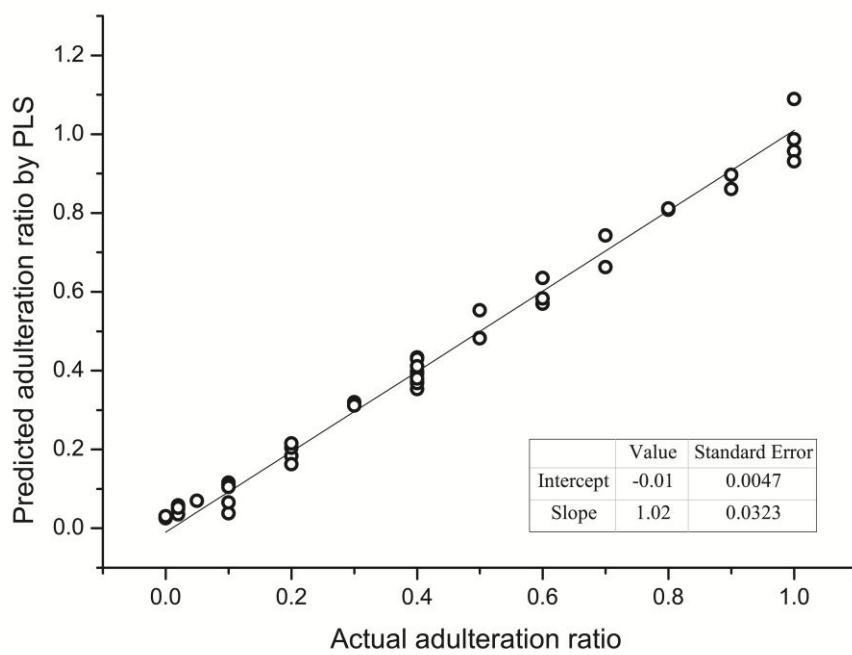

Supplement: c2ay25431j.pdf [file c2ay25431j.pdf]
